# Supplementary material
Source: publisher site journal article supplement (https://www.spandidos-publications.com/7656/downloadSupplementary)
Supplement: Supplementary file 1 [file downloadSupplementary]

**Table SI.** Response rate of patients in the present study according to the criteria used (n=123).

| <b>Response</b>         | <b>RECIST (version 1.1)</b> | <b>Modified RECIST</b> |
|-------------------------|-----------------------------|------------------------|
| Complete response       | 11 (8.9)                    | 13 (10.6)              |
| Partial response        | 25 (20.3)                   | 34 (27.6)              |
| Stable disease          | 61 (49.6)                   | 50 (40.7)              |
| Progressive disease     | 26 (21.1)                   | 26 (21.1)              |
| Objective response rate | 36 (29.3)                   | 47 (38.2)              |
| Disease control rate    | 97 (78.9)                   | 97 (78.9)              |

Data are presented as n (%). RECIST, Response Evaluation Criteria in Solid Tumors.
